# Supplementary material for: Sleep–Wake Disturbance Related to Ocular Disease: A Systematic Review of Phase-Shifting Pharmaceutical Therapies
Source: PubMed Central journal article supplement — Transl Vis Sci Technol. 2019 Jun 26;8(3):49. doi: 10.1167/tvst.8.3.49 (PMC6601468; doi:10.1167/tvst.8.3.49), 2019-06-26
Supplement: i2164-2591-8-3-49_s02.pdf [file i2164-2591-8-3-49_s02.pdf]

## Supplement 2: Data Extraction Sheet

|    |                                                                                                                                                                                                                                                                                                                                                                                                                                   |  |
|----|-----------------------------------------------------------------------------------------------------------------------------------------------------------------------------------------------------------------------------------------------------------------------------------------------------------------------------------------------------------------------------------------------------------------------------------|--|
|    | Source                                                                                                                                                                                                                                                                                                                                                                                                                            |  |
| 1  | Reviewer                                                                                                                                                                                                                                                                                                                                                                                                                          |  |
| 2  | study id (last name of first author and year of publication)                                                                                                                                                                                                                                                                                                                                                                      |  |
| 3  | report id                                                                                                                                                                                                                                                                                                                                                                                                                         |  |
| 4  | Citation                                                                                                                                                                                                                                                                                                                                                                                                                          |  |
| 5  | author contact details                                                                                                                                                                                                                                                                                                                                                                                                            |  |
|    | eligibility & methods                                                                                                                                                                                                                                                                                                                                                                                                             |  |
| 6  | confirm eligibility for review (y/n)                                                                                                                                                                                                                                                                                                                                                                                              |  |
| 7  | reason for exclusion<br><br>(1: does not involve human participants; <b>2: participants do not have an ocular condition</b> ; 3: does not include a pharmaceutical agent for the promotion of sleep; <b>4: does not include an outcome measure of sleep quality, duration or latency</b> ; 5: not a randomised controlled trial; <b>6: not published in english</b> ; 7: participants do not have sleep disturbance; <b>n/a</b> ) |  |
| 8  | study design                                                                                                                                                                                                                                                                                                                                                                                                                      |  |
| 9  | sequence generation (method)                                                                                                                                                                                                                                                                                                                                                                                                      |  |
| 10 | sequence generation (reviewer's judgement)                                                                                                                                                                                                                                                                                                                                                                                        |  |
| 11 | allocation sequence concealment (description)                                                                                                                                                                                                                                                                                                                                                                                     |  |
| 12 | allocation sequence concealment (reviewer's judgement)                                                                                                                                                                                                                                                                                                                                                                            |  |
| 13 | masking: participants and personnel (description)                                                                                                                                                                                                                                                                                                                                                                                 |  |
| 14 | masking: participants and personnel (reviewer's description)                                                                                                                                                                                                                                                                                                                                                                      |  |
| 15 | masking: outcome measurements (description)                                                                                                                                                                                                                                                                                                                                                                                       |  |

**Supplement 2: Data Extraction Sheet**

|    |                                                              |  |
|----|--------------------------------------------------------------|--|
| 16 | masking: participants and personnel (reviewer's description) |  |
|    | Participants                                                 |  |
| 17 | Setting                                                      |  |
| 18 | N                                                            |  |
| 19 | mean age (sd)                                                |  |
| 20 | sex (% female)                                               |  |
| 21 | country recruited                                            |  |
| 22 | % no perception of light (NPL)                               |  |
| 23 | includes adults (y/n)                                        |  |
| 24 | includes <18s (y/n)                                          |  |
| 25 | sleep dysfunction                                            |  |
| 26 | diagnostic criteria for sleep dysfunction                    |  |
| 27 | baseline circadian cycle period (if applicable): mean (sd)   |  |
| 28 | ocular condition                                             |  |
| 29 | concomitant medications (y/n)                                |  |
| 30 | withdrawals                                                  |  |
|    | Interventions                                                |  |
| 31 | total number of intervention groups                          |  |
| 32 | pharmaceutical intervention                                  |  |
| 33 | Dosage                                                       |  |
| 34 | timing of imp                                                |  |

## Supplement 2: Data Extraction Sheet

|    |                                                |  |
|----|------------------------------------------------|--|
| 35 | determination of timing of imp                 |  |
| 36 | comparator                                     |  |
| 37 | duration varied per participant (y/n)          |  |
| 38 | duration of treatment                          |  |
| 39 | determination of treatment duration            |  |
| 40 | co-interventions                               |  |
|    | Outcomes                                       |  |
| 41 | Outcome                                        |  |
| 42 | timepoint measured                             |  |
| 43 | unit of measurement                            |  |
| 44 | measurement range (for scales)                 |  |
| 45 | high score good/ bad (scales)                  |  |
|    | Results                                        |  |
| 46 | sample size                                    |  |
| 47 | n intervention                                 |  |
| 48 | n comparator                                   |  |
| 49 | incomplete outcome data                        |  |
| 50 | incomplete outcome data (reviewer's judgement) |  |
| 51 | measurement                                    |  |
| 52 | summary data for intervention group            |  |
| 53 | summary data for comparison group              |  |

## Supplement 2: Data Extraction Sheet

|    |                                                                                    |  |
|----|------------------------------------------------------------------------------------|--|
| 54 | estimate of effect with confidence interval; p value                               |  |
| 55 | subgroup analyses                                                                  |  |
| 56 | selective reporting                                                                |  |
| 57 | selective reporting. (reviewer's judgement)                                        |  |
|    | miscellaneous                                                                      |  |
| 58 | other concerns about bias                                                          |  |
| 59 | other concerns about bias (reviewer's judgement)                                   |  |
| 60 | funding source                                                                     |  |
| 61 | key conclusions of the study authors                                               |  |
| 62 | miscellaneous comments from the study authors                                      |  |
| 63 | references to other relevant studies                                               |  |
| 64 | correspondence required (y/n)                                                      |  |
| 65 | miscellaneous comments by the reviewer                                             |  |
|    | risk of bias                                                                       |  |
| 66 | to be populated from rows 9, 10, 11, 12, 13, 14, 15, 16, 49, 50, 56, 57, 58 and 59 |  |
